# Supplementary material
Source: PubMed Central journal article supplement (PMC5528592)
Supplement: MOL2-8-1404-s001.pdf [file MOL2-8-1404-s001.pdf]

| Code | Name                     | Description                          | Final concentration |
|------|--------------------------|--------------------------------------|---------------------|
| A1   | DMSO                     | Solvent                              | 0.1 %               |
| A2   | Roscovitine              | CDK inhibitor                        | 60 $\mu$ M          |
| A3   | N-acetylcysteine         | Antioxidant                          | 500 $\mu$ M         |
| A4   | IIB-08                   | SHP2 inhibitor                       | 5 $\mu$ M           |
| A5   | RG108                    | DNA methyltransferase inhibitor      | 100 $\mu$ M         |
| A6   | TGF $\beta$              | Cytokine                             | 2 ng/ml             |
| A7   | PHPS1                    | SHP2 inhibitor                       | 10 $\mu$ M          |
| A8   | NSC95397                 | CDC25 inhibitor                      | 2.5 $\mu$ M         |
| A9   | Tumor necrosis factor    | Cytokine                             | 2 ng/ml             |
| A10  | Ciliobrevin D            | Cytoplasmic dynein inhibitor         | 25 $\mu$ M          |
| A11  | Wortmannin               | PI3K inhitor                         | 1 mM                |
| A12  | PMA                      | Phorbol ester                        | 500 nM              |
| B1   | IIB-05                   | SHP2 inhibitor                       | 5 $\mu$ M           |
| B2   | Lithium chloride         | GSK3 inhibitor                       | 1 mM                |
| B3   | Sodium butyrate          | HDAC inhibitor                       | 100 $\mu$ g/ml      |
| B4   | Ciprofloxacin HCl        | Antibiotic                           | 10 $\mu$ g/ml       |
| B6   | Adenosine                | Nucleoside                           | 40 $\mu$ M          |
| B7   | NaOH                     | Alkaline                             | 0.5 mM              |
| B8   | Bucladesine              | cAMP analog                          | 50 $\mu$ g/ml       |
| B9   | BrdU                     | Nucleoside analog                    | 10 $\mu$ M          |
| B10  | Pyridoxine hydrochloride | Vitamin B6                           | 600 $\mu$ M         |
| B12  | Polybrene                | Cationic polymer                     | 4 $\mu$ g/ml        |
| C1   | Ethanol                  | Solvent                              | 0.1 %               |
| C2   | DTT                      | Reducing agent                       | 1 mM                |
| C3   | 5 aza 2'deoxyctidine     | DNA methyltransferase inhibitor      | 10 $\mu$ M          |
| C4   | RO3306                   | CDK1 inhibitor                       | 1.25 $\mu$ M        |
| C5   | Rapamycin                | mTOR inhibitors                      | 1 $\mu$ M           |
| C6   | EHNA                     | Dynein Inhibitor                     | 50 $\mu$ M          |
| C7   | Tunicamycin              | Glycosylation inhibitor              | 100 ng/ml           |
| C8   | Caffeine                 | ATM inhibitor                        | 125 $\mu$ M         |
| C9   | LY-294002                | PI3K inhibitor                       | 5 $\mu$ M           |
| C10  | Lonafarnib               | Farnesyltransferase inhibitor        | 10 $\mu$ M          |
| C11  | Monastrol                | Kinesin-5 inhibitor                  | 25 $\mu$ M          |
| C12  | Thymidine                | Nucleoside                           | 200 $\mu$ M         |
| D1   | Dihydrocytochalasin      | Actin assembly inhibitor             | 5 $\mu$ M           |
| D2   | Lovastatin               | HMG-CoA inhibitor                    | 5 $\mu$ M           |
| D3   | Cisplatin                | Platinum-containing anti-cancer drug | 0.1 $\mu$ g/ml      |
| D4   | ZM-447349                | Aurora kinase inhibitor              | 2.5 $\mu$ M         |
| D5   | Sorafenib tosylate       | Kinase inhibitor                     | 10 $\mu$ M          |
| D7   | Latacystin               | 20S proteasome inhibitor             | 25 $\mu$ M          |
| D8   | GW843682X                | PLK1 inhibitor                       | 1.25 $\mu$ M        |
| D9   | Taxol                    | Spindle poison                       | 0.625 nM            |
| D10  | Bortezomib               | 26S proteasome inhibitor             | 2.5 nM              |
| D11  | SB203580                 | p38 kinase inhibitor                 | 10 $\mu$ M          |
| E1   | PD-98059                 | MEK inhibitor                        | 10 $\mu$ M          |
| E2   | Methoytrexate            | Dihydrofolate reductase inhibitor    | 20 nM               |
| E3   | Arsenic trioxide         | Arsenic salt                         | 625 nM              |
| E4   | MLN2238                  | Proteasome inhibitor                 | 12.5 nM             |
| E5   | AZD2281                  | PARP inhibitor                       | 10 $\mu$ M          |
| E6   | Nocodazole               | Spindle poison                       | 2.5 ng/ml           |
| E7   | Vincristine              | Spindle poison                       | 1 nM                |
| E8   | MLN8237                  | Aurora kinase inhibitor              | 10 nM               |
| E9   | AZD7762                  | CHK1 inhibitor                       | 10 nM               |
| E10  | Adriamycin               | Topoisomerase II inhibitor           | 200 ng/ml           |
| E11  | MK-1775                  | WEE1 inhibitor                       | 50 nM               |
| E12  | Etoposide                | Topoisomerase II inhibitor           | 100 ng/ml           |
| F1   | UCN-01                   | CHK1 inhibitor                       | 10 nM               |

|     |                          |                                    |               |
|-----|--------------------------|------------------------------------|---------------|
| F2  | VX689                    | Aurora A inhibitor                 | 50 nM         |
| F3  | Aphidicolin              | DNA polymerase inhibitor           | 25 ng/ml      |
| F4  | MG132                    | Proteasome inhibitor               | 100 nM        |
| F5  | Barasertib               | Aurora B inhibitor                 | 10 nM         |
| F6  | NSC 663284               | CDC25 inhibitor                    | 500 nM        |
| F7  | Sodium selenite          | Selenium salt                      | 5 $\mu$ M     |
| F8  | 8-azaguanine             | Nucleoside analog                  | 3 $\mu$ M     |
| F9  | $\beta$ -mercaptoethanol | Reducing agent                     | 14.3 $\mu$ M  |
| F10 | BX795                    | PDK inhibitor                      | 500 nM        |
| F11 | MG101                    | Proteasome inhibitor               | 1 $\mu$ g/ml  |
| F12 | Tipifarnib               | Farnesyltransferase inhibitor      | 1 $\mu$ M     |
| G1  | Dovitinib                | Kinase inhibitor                   | 250 nM        |
| G2  | AZ 3146                  | MPS1 inhibitor                     | 500 nM        |
| G3  | Hydroxyurea              | ribonucleotide reductase inhibitor | 75 $\mu$ M    |
| G4  | Mitomycin C              | DNA crosslinker                    | 2.5 ng/ml     |
| G5  | Temozolomide             | DNA alkylating agent               | 6.25 $\mu$ M  |
| G6  | Retinoic acid            | Ligand                             | 50 $\mu$ M    |
| G7  | Okadaic acid             | PP2A inhibitor                     | 20 ng/ml      |
| G8  | SP600125                 | JNK inhibitor                      | 2.5 $\mu$ M   |
| G9  | Leptomycin B             | Exportin 1 inhibitor               | 1 ng/ml       |
| G11 | TRAIL                    | Death receptor ligand              | 2.5 ng/ml     |
| H1  | Calpain inhibitor I      | Calpain inhibitor                  | 2.5 $\mu$ M   |
| H2  | Camptothecin             | Topoisomerase I inhibitor          | 1 nM          |
| H3  | SB743921                 | Kinesin-5 inhibitor                | 1 nM          |
| H4  | BI2536                   | PLK1 inhibitor                     | 2 nM          |
| H5  | GSH                      | Reducing agent                     | 10 $\mu$ g/ml |
| H6  | Deoxycytidine            | Nucleoside                         | 25 $\mu$ M    |
