# Supplementary material
Source: PubMed Central journal article supplement (PMC5528592)

**A**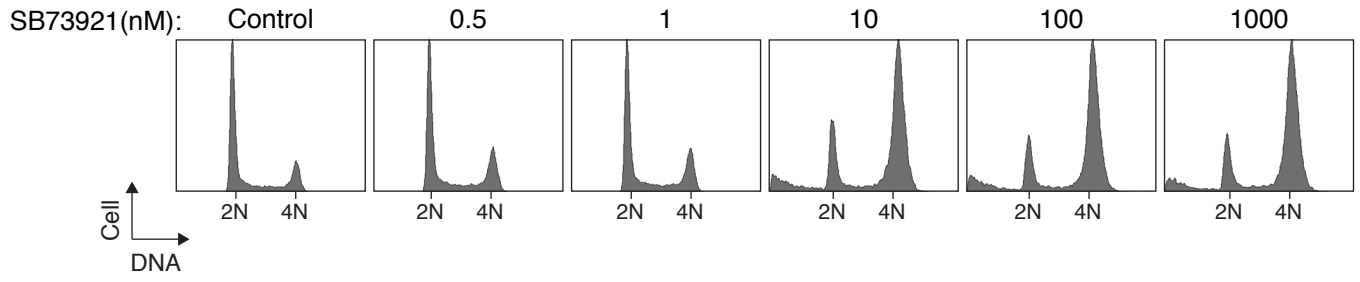**B**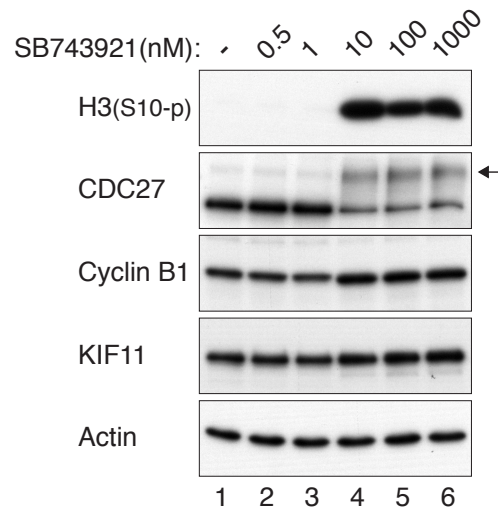**C**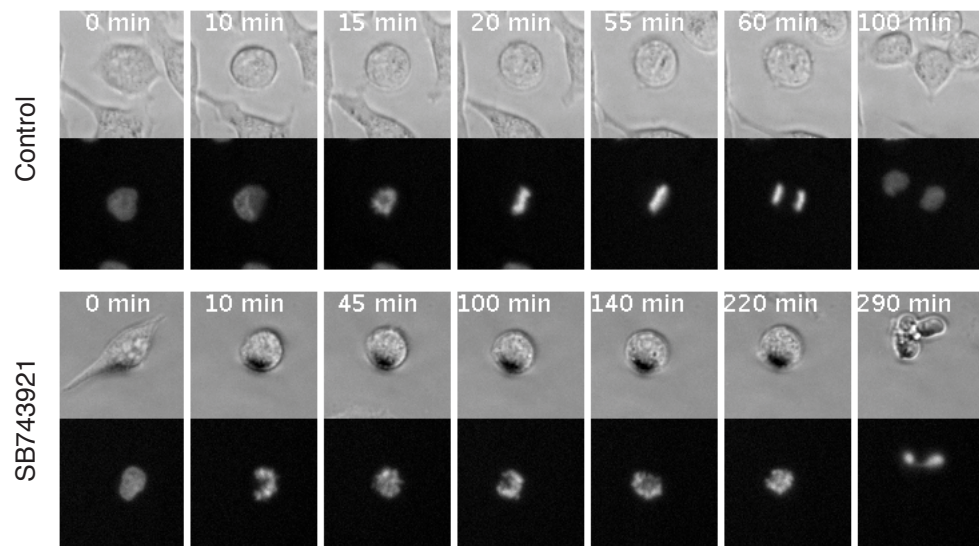

Figure S2

Supplement: MOL2-8-1404-s002.pdf [file MOL2-8-1404-s002.pdf]

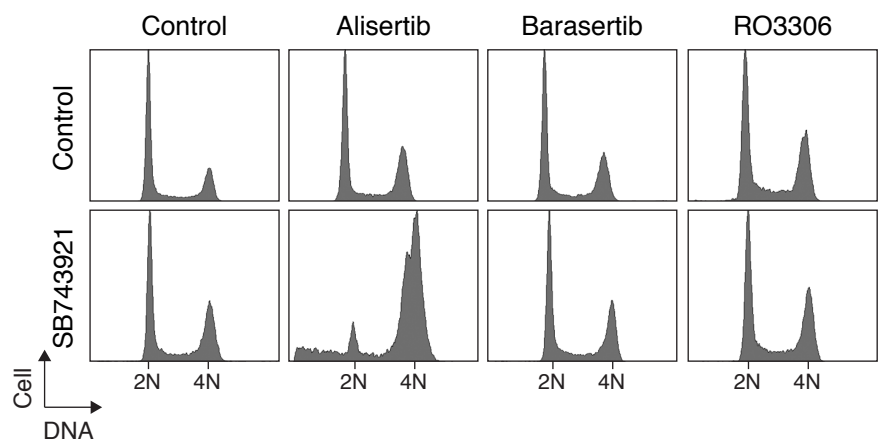

Figure S3

Supplement: MOL2-8-1404-s003.pdf [file MOL2-8-1404-s003.pdf]

**A**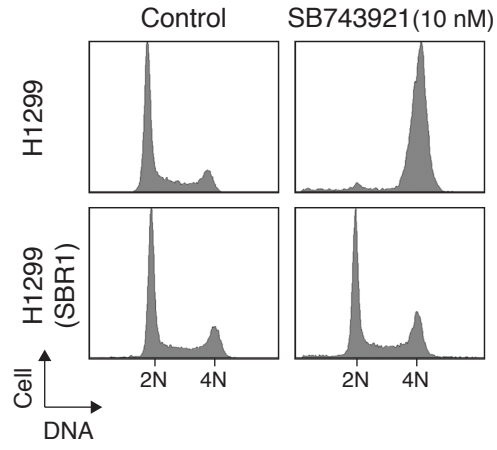**B**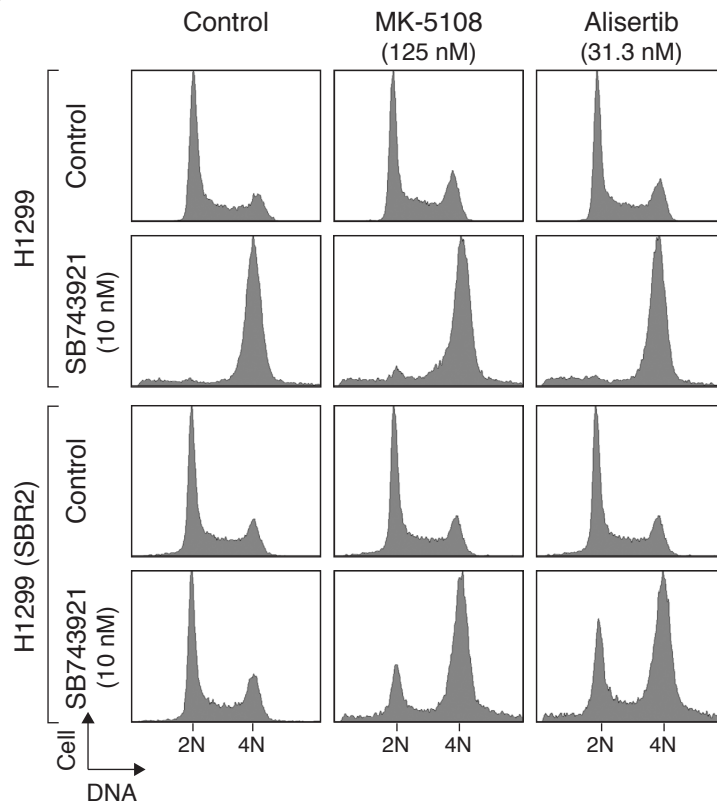

Figure S4

Supplement: MOL2-8-1404-s004.pdf [file MOL2-8-1404-s004.pdf]

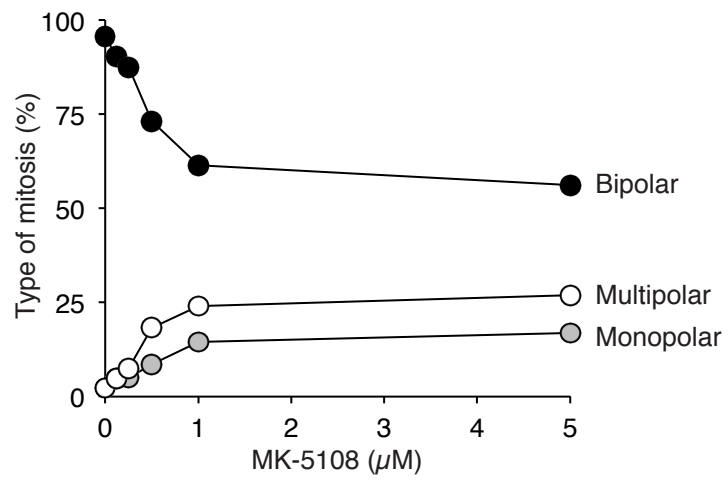

Figure S5

Supplement: MOL2-8-1404-s005.pdf [file MOL2-8-1404-s005.pdf]
